# Supplementary material
Source: PubMed Central journal article supplement (PMC1661779)

## Supplementary Material

### **Detection of a high-barrier conformational change in the active site of cytochrome**

#### **P450<sub>cam</sub> upon binding of putidaredoxin**

Julie W. Wei<sup>1</sup>, Thomas C. Pochapsky\* and Susan Sondej Pochapsky<sup>1</sup>

Department of Chemistry, Brandeis University

415 South St. MS 015, Waltham, MA 02454-9110

- 1) AMBER 8 (D. Case et al., UCSF, 2004) script for dynamics run
- 2) Selected dynamics tracks
- 3) <sup>1</sup>H, <sup>13</sup>C HSQC of perdeuterated CYP101-CO-bound camphor

AMBER control file (sander script)

Minimization without Cartesian restraints

```
&cntrl
  imin = 0,
  ntb = 0, igb = 0,
  ntp = 100, ntwx=100, ntwv=100, ntwe=100, ntave=100,
ntwr=100, ntwr=500,
  ntt = 3, gamma_ln = 1.0,
  tempi = 300.0, temp0 = 300.0
  nstlim = 1000000000, nscm=500, dt = 0.002,
  cut = 12.0,
  nmropt=2, pncut=-0.001, ipnlty=1,
/
&ewald
  eedmeth=5,
/

  &wt type='SHIFTS',
istep1=0,istep2=1000000000,value1=1.0,value2=1.0, /
  &wt type='END' /
LISTIN=POUT
LISTOUT=POUT
SHIFTS=./rel_camshf2
```

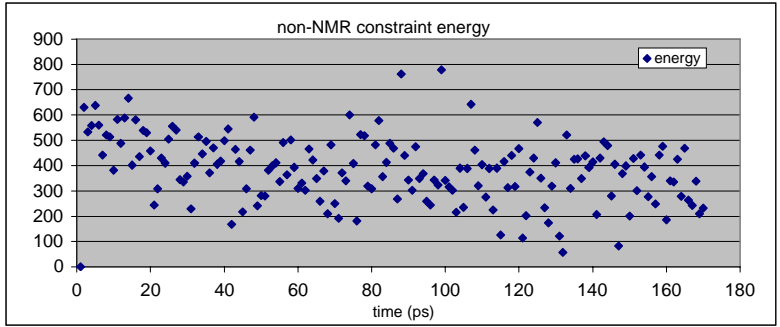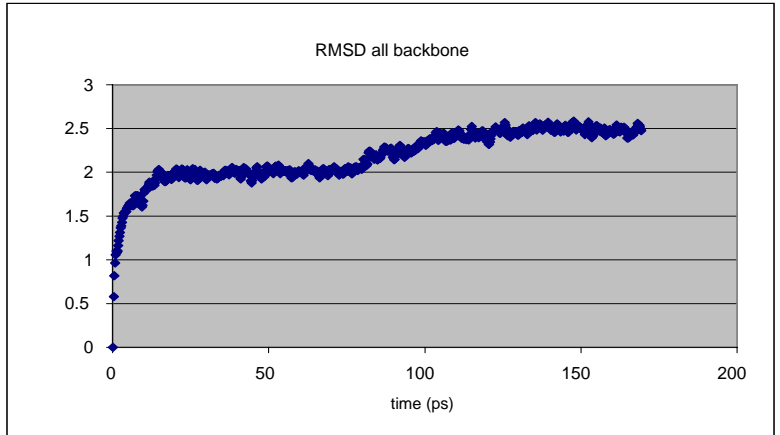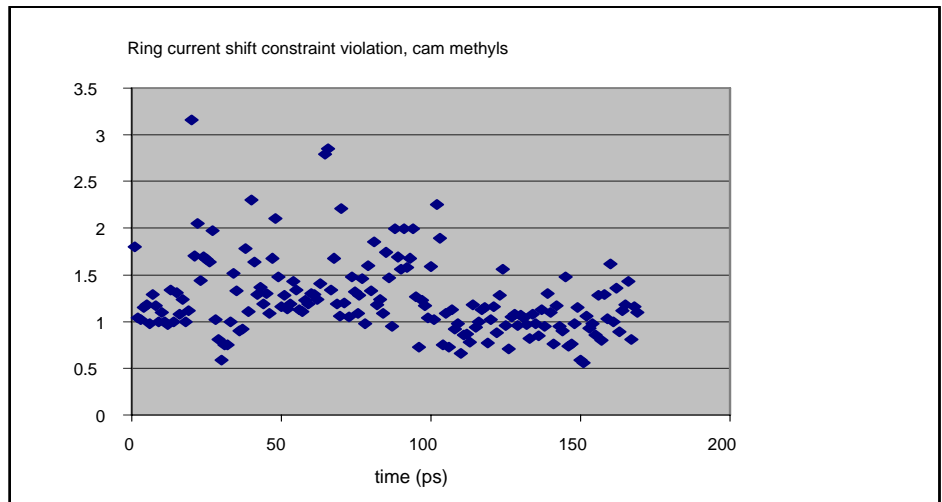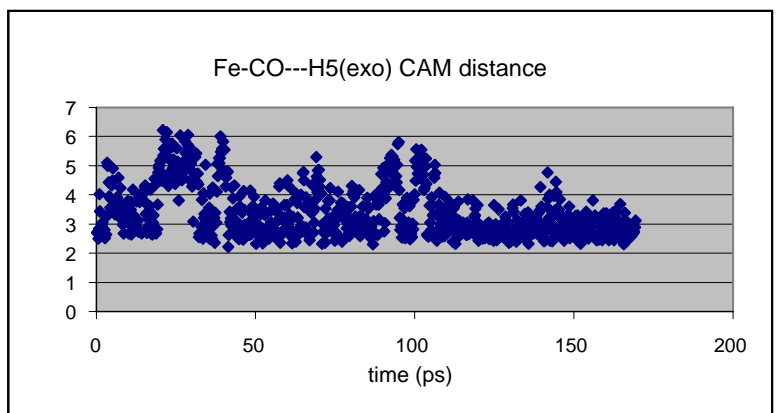

Supplement: NIHMS13721-supplement-supp.pdf [file NIHMS13721-supplement-supp.pdf]
